# Supplementary material
Source: PubMed Central journal article supplement (PMC3691291)
Supplement: NIHMS479824-supplement-01.pdf [file NIHMS479824-supplement-01.pdf]

Common protein folding models, non-redundant set (<95% sequence ID)

| Protein name                                                     | sequence length (aa) | # of TMHs (TMHMM)? | Has PDB? | multimerization? | Reference                                                                                                                  |
|------------------------------------------------------------------|----------------------|--------------------|----------|------------------|----------------------------------------------------------------------------------------------------------------------------|
| Tryptophan cage                                                  | 20                   | 0                  | Yes      | Monomer          | Tartaglia et al., Sawle et al., Ouyang et al.                                                                              |
| GCN-4                                                            | 34                   | 0                  | Yes      | Dimer            | Jackson                                                                                                                    |
| WW domain pin                                                    | 34                   | 0                  | Yes      | Monomer          | Tartaglia et al., Ouyang et al.                                                                                            |
| WW prototype                                                     | 37                   | 0                  | Yes      | Monomer          | Tartaglia et al., Ouyang et al.                                                                                            |
| WW domain FBP28                                                  | 37                   | 0                  | Yes      | Monomer          | Naganathan et al., Tartaglia et al., Ouyang et al.                                                                         |
| WW domain YAP65                                                  | 40                   | 0                  | Yes      | Monomer          | Tartaglia et al., Ouyang et al.                                                                                            |
| E3/E1 domain of dihydrolipoyl acyltransferase / PSBD (1ebd)      | 43                   | 0                  | Yes      | Monomer          | Naganathan et al., Galzitskaya et al., Tartaglia et al., Ouyang et al.                                                     |
| POB L146A Y166W                                                  | 51                   | 0                  | Yes      | Monomer          | Naganathan et al.,                                                                                                         |
| Lac Repressor Headpiece                                          | 51                   | 0                  | Yes      | Monomer          | Sawle et al.                                                                                                               |
| Arc repressor                                                    | 53                   | 0                  | Yes      | Dimer            | Jackson                                                                                                                    |
| Human TRF1 Myb domain                                            | 53                   | 0                  | Yes      | Monomer          | Tartaglia et al., Ouyang et al.                                                                                            |
| Albumin binding domain                                           | 53                   | 0                  | Yes      | Monomer          | Tartaglia et al., Sawle et al., Ouyang et al.                                                                              |
| c-Myb transforming protein                                       | 54                   | 0                  | Yes      | Monomer          | Tartaglia et al., Ouyang et al.                                                                                            |
| $\beta$ -hairpin of protein G                                    | 55                   | 0                  | Yes      | Monomer          | Tartaglia et al., Ouyang et al.                                                                                            |
| N-terminal domain from L9                                        | 56                   | 0                  | Yes      | Monomer          | Naganathan et al., Galzitskaya et al., Tartaglia et al., Ouyang et al.                                                     |
| OMTKY3                                                           | 56                   | 0                  | Yes      | Monomer          | Sawle et al.                                                                                                               |
| Protein G (B domain)                                             | 56                   | 0                  | Yes      | Monomer          | Naganathan et al., Galzitskaya et al., Tartaglia et al., Sawle et al., Ouyang et al.                                       |
| Engrailed home domain                                            | 58                   | 0                  | Yes      | Monomer          | Tartaglia et al., Ouyang et al.                                                                                            |
| BPTI                                                             | 58                   | 0                  | Yes      | Monomer          | Sawle et al.                                                                                                               |
| Abl                                                              | 58                   | 0                  | Yes      | Monomer          | Sawle et al.                                                                                                               |
| Human RAP1 Myb domain                                            | 59                   | 0                  | Yes      | Monomer          | Tartaglia et al., Ouyang et al.                                                                                            |
| B domain of protein A                                            | 62                   | 0                  | Yes      | Monomer          | Naganathan et al., Tartaglia et al., Ouyang et al.                                                                         |
| Sem5                                                             | 62                   | 0                  | Yes      | Monomer          | Sawle et al.                                                                                                               |
| SH3 domain (a-spectrin)                                          | 62                   | 0                  | Yes      | Monomer          | Naganathan et al., Galzitskaya et al., Jackson, Tartaglia et al., Sawle et al., Ouyang et al.                              |
| ROP                                                              | 62                   | 0                  | Yes      | Dimer            | Jackson                                                                                                                    |
| Chymotrypsin inhibitor Cl2                                       | 64                   | 0                  | Yes      | Monomer          | Plaxco et al., Naganathan et al., Galzitskaya et al., Jackson, Tartaglia et al., Sawle et al., Sawle et al., Ouyang et al. |
| Itk                                                              | 64                   | 0                  | Yes      | Monomer          | Sawle et al.                                                                                                               |
| SH3 domain (src)                                                 | 64                   | 0                  | Yes      | Monomer          | Naganathan et al., Galzitskaya et al., Jackson, Tartaglia et al., Ouyang et al.                                            |
| Chromosomal protein Sso7d                                        | 64                   | 0                  | Yes      | Monomer          | Naganathan et al., Galzitskaya et al., Tartaglia et al., Sawle et al., Ouyang et al.                                       |
| Bergerac                                                         | 65                   | 0                  | Yes      | Monomer          | Sawle et al.                                                                                                               |
| Sac7d                                                            | 66                   | 0                  | Yes      | Monomer          | Sawle et al.                                                                                                               |
| CspB ( <i>Bacillus caldolyticus</i> )                            | 66                   | 0                  | Yes      | Monomer          | Galzitskaya et al., Jackson, Tartaglia et al., Sawle et al., Ouyang et al.                                                 |
| CspB ( <i>Thermotoga maritima</i> )                              | 66                   | 0                  | Yes      | Monomer          | Galzitskaya et al., Jackson, Tartaglia et al., Sawle et al., Ouyang et al.                                                 |
| Villin headpiece                                                 | 67                   | 0                  | Yes      | Monomer          | Tartaglia et al., Ouyang et al.                                                                                            |
| Btk                                                              | 67                   | 0                  | Yes      | Monomer          | Sawle et al.                                                                                                               |
| Tec                                                              | 67                   | 0                  | Yes      | Monomer          | Sawle et al.                                                                                                               |
| CspB ( <i>Bacillus subtilis</i> )                                | 67                   | 0                  | Yes      | Monomer          | Plaxco et al., Naganathan et al., Galzitskaya et al., Jackson, Tartaglia et al., Sawle et al., Ouyang et al.               |
| SH3 domain (fyn)                                                 | 67                   | 0                  | Yes      | Monomer          | Plaxco et al., Naganathan et al., Galzitskaya et al., Jackson, Tartaglia et al., Sawle et al., Ouyang et al.               |
| CspA                                                             | 69                   | 0                  | Yes      | Monomer          | Galzitskaya et al., Jackson, Tartaglia et al., Sawle et al., Ouyang et al.                                                 |
| Photosystem I accessory protein / Photosystem I protein E (PSAE) | 69                   | 0                  | Yes      | Monomer          | Galzitskaya et al., Tartaglia et al., Sawle et al.                                                                         |
| Eglin C                                                          | 70                   | 0                  | Yes      | Monomer          | Sawle et al.                                                                                                               |
| Type III Antifreeze                                              | 70                   | 0                  | Yes      | Monomer          | Sawle et al.                                                                                                               |
| FF domain from HYPA/FBP11                                        | 71                   | 0                  | Yes      | Monomer          | Tartaglia et al., Ouyang et al.                                                                                            |
| Cro protein                                                      | 71                   | 0                  | Yes      | Monomer          | Galzitskaya et al., Tartaglia et al., Ouyang et al.                                                                        |
| MerP                                                             | 72                   | 0                  | Yes      | Monomer          | Tartaglia et al., Ouyang et al.                                                                                            |
| IgG binding domain of streptococcal protein L                    | 72                   | 0                  | Yes      | Monomer          | Plaxco et al., Naganathan et al., Galzitskaya et al., Jackson, Tartaglia et al.                                            |
| Alpha 3D                                                         | 73                   | 0                  | Yes      | Monomer          | Sawle et al., Ouyang et al.                                                                                                |
| Tendamistat                                                      | 74                   | 0                  | Yes      | Monomer          | Jackson, Tartaglia et al., Sawle et al., Ouyang et al.                                                                     |

|                                                   |     |   |     |         |                                                                                                              |
|---------------------------------------------------|-----|---|-----|---------|--------------------------------------------------------------------------------------------------------------|
| ubiquitin                                         | 76  | 0 | Yes | Monomer | Plaxco et al., Naganathan et al., Galzitskaya et al., Jackson, Tartaglia et al., Sawle et al., Ouyang et al. |
| Activation domain procarboxypeptidase A2 (ADAh2)  | 76  | 0 | Yes | Monomer | Plaxco et al., Naganathan et al., Galzitskaya et al., Jackson                                                |
| Acyl Carrier Protein (apo)                        | 77  | 0 | Yes | Monomer | Sawle et al.                                                                                                 |
| Ras-binding domain of C-RAF1                      | 79  | 0 | Yes | Monomer | Naganathan et al., Tartaglia et al., Ouyang et al.                                                           |
| SH3 domain (PI3 kinase)                           | 79  | 0 | Yes | Monomer | Galzitskaya et al., Jackson, Tartaglia et al., Ouyang et al.                                                 |
| HT c552                                           | 80  | 0 | Yes | Monomer | Sawle et al.                                                                                                 |
| Spliceosomal protein U1A                          | 80  | 0 | Yes | Monomer | Galzitskaya et al., Jackson, Tartaglia et al., Ouyang et al.                                                 |
| monomeric I repressor (I6-85)                     | 81  | 0 | Yes | Monomer | Plaxco et al., Galzitskaya et al., Jackson, Sawle et al., Ouyang et al.                                      |
| PA c551                                           | 82  | 0 | Yes | Monomer | Sawle et al.                                                                                                 |
| CPS                                               | 85  | 0 | Yes | Monomer | Sawle et al.                                                                                                 |
| Hpr (histidine-containing phosphocarrier protein) | 85  | 0 | Yes | Monomer | Plaxco et al., Galzitskaya et al., Jackson, Tartaglia et al., Sawle et al., Ouyang et al.                    |
| Acyl-CoA binding protein ACBP (yeast)             | 86  | 0 | Yes | Monomer | Naganathan et al., Jackson, Ouyang et al.                                                                    |
| Acyl-CoA binding protein                          | 86  | 0 | Yes | Monomer | Tartaglia et al.                                                                                             |
| Colicin E9 immunity protein                       | 86  | 0 | Yes | Monomer | Naganathan et al., Galzitskaya et al., Tartaglia et al., Ouyang et al.                                       |
| ACBP (bovine, rat)                                | 87  | 0 | No  | Monomer | Plaxco et al., Naganathan et al., Galzitskaya et al., Jackson,                                               |
| Histidine Bh                                      | 87  | 0 | No  | Monomer | Sawle et al.                                                                                                 |
| Histidine BSt                                     | 88  | 0 | Yes | Monomer | Sawle et al.                                                                                                 |
| Histidine BS                                      | 88  | 0 | Yes | Monomer | Sawle et al.                                                                                                 |
| Twitchin Ig repeat 27                             | 89  | 0 | Yes | Monomer | Galzitskaya et al., Tartaglia et al., Ouyang et al.                                                          |
| NPS                                               | 89  | 0 | Yes | Monomer | Sawle et al.                                                                                                 |
| Fibronectin 9th FN3 module                        | 89  | 0 | Yes | Monomer | Galzitskaya et al., Jackson, Tartaglia et al., Ouyang et al.                                                 |
| Barstar                                           | 89  | 0 | Yes | Monomer | Galzitskaya et al., Jackson, Tartaglia et al., Sawle et al., Ouyang et al.                                   |
| TnFN3 / Tenascin (short form)                     | 90  | 0 | Yes | Monomer | Plaxco et al., Galzitskaya et al., Jackson, Tartaglia et al., Ouyang et al.                                  |
| HypF                                              | 91  | 0 | Yes | Monomer | Tartaglia et al., Ouyang et al.                                                                              |
| C-terminal of L9                                  | 92  | 0 | Yes | Monomer | Naganathan et al., Tartaglia et al., Ouyang et al.                                                           |
| hblBD (BCKD)                                      | 93  | 0 | Yes | Monomer | Tartaglia et al., Ouyang et al.                                                                              |
| Twitchin                                          | 93  | 0 | Yes | Monomer | Galzitskaya et al., Jackson, Tartaglia et al., Ouyang et al.                                                 |
| Colicin E7 immunity protein                       | 94  | 0 | Yes | Monomer | Galzitskaya et al., Tartaglia et al., Ouyang et al.                                                          |
| Fibronectin 10th FN3 module                       | 94  | 0 | Yes | Monomer | Galzitskaya et al., Jackson, Tartaglia et al., Ouyang et al.                                                 |
| Ribosomal protein L23                             | 96  | 0 | Yes | Monomer | Naganathan et al., Tartaglia et al., Ouyang et al.                                                           |
| Rnase Sa                                          | 96  | 0 | Yes | Monomer | Sawle et al.                                                                                                 |
| Rnase Sa2                                         | 97  | 0 | Yes | Monomer | Sawle et al.                                                                                                 |
| Muscle AcP                                        | 98  | 0 | Yes | Monomer | Plaxco et al., Naganathan et al., Galzitskaya et al., Jackson, Tartaglia et al., Ouyang et al.               |
| Stefin A                                          | 98  | 0 | Yes | Monomer | Sawle et al.                                                                                                 |
| Stefin B                                          | 98  | 0 | Yes | Monomer | Sawle et al.                                                                                                 |
| ApoCytochrome b5                                  | 98  | 0 | Yes | Monomer | Sawle et al.                                                                                                 |
| CD2_1st domain                                    | 99  | 0 | Yes | Monomer | Galzitskaya et al., Jackson, Tartaglia et al., Sawle et al., Ouyang et al.                                   |
| Acylphosphatase (CT)                              | 99  | 0 | Yes | Monomer | Ouyang et al.                                                                                                |
| Rnase Sa3                                         | 99  | 0 | Yes | Monomer | Sawle et al.                                                                                                 |
| S6                                                | 101 | 0 | Yes | Monomer | Galzitskaya et al.                                                                                           |
| Ribosomal L30E                                    | 102 | 0 | Yes | Monomer | Sawle et al.                                                                                                 |
| ONC                                               | 104 | 0 | Yes | Monomer | Sawle et al.                                                                                                 |
| Rnase T1                                          | 104 | 0 | Yes | Monomer | Sawle et al.                                                                                                 |
| Cytochrome C Horse                                | 105 | 0 | Yes | Monomer | Plaxco et al., Jackson                                                                                       |
| Alkaline Proteinase Inhibitor                     | 106 | 0 | Yes | Monomer | Sawle et al.                                                                                                 |
| Cytochrome b562                                   | 106 | 0 | Yes | Monomer | Naganathan et al., Galzitskaya et al., Sawle et al.                                                          |
| TRP Repressor                                     | 107 | 0 | Yes | Monomer | Sawle et al.                                                                                                 |
| FKBP12                                            | 107 | 0 | Yes | Monomer | Naganathan et al., Galzitskaya et al., Jackson, Tartaglia et al., Ouyang et al.                              |
| Cytochrome C Yeast                                | 108 | 0 | Yes | Monomer | Jackson                                                                                                      |
| Parvalbumin                                       | 108 | 0 | Yes | Monomer | Sawle et al.                                                                                                 |
| Thioredoxin                                       | 108 | 0 | Yes | Monomer | Sawle et al.                                                                                                 |
| Barnase                                           | 110 | 0 | Yes | Monomer | Galzitskaya et al., Jackson, Tartaglia et al., Sawle et al., Ouyang et al.                                   |
| S16 (Thermo)                                      | 112 | 0 | Yes | Monomer | Sawle et al.                                                                                                 |
| Iso2 Cytochrome                                   | 112 | 0 | Yes | Monomer | Sawle et al.                                                                                                 |
| ECAD2                                             | 112 | 0 | Yes | Monomer | Sawle et al.                                                                                                 |
| Subtilisin Inhibitor                              | 113 | 0 | Yes | Monomer | Sawle et al.                                                                                                 |
| Suc1 / Cell cycle regulatory protein              | 113 | 0 | Yes | Dimer   | Galzitskaya et al., Jackson, Tartaglia et al., Ouyang et al.                                                 |
| Oncoprotein P13MTCP1                              | 117 | 0 | Yes | Monomer | Tartaglia et al., Ouyang et al.                                                                              |

|                                         |     |                      |     |         |                                                                                 |
|-----------------------------------------|-----|----------------------|-----|---------|---------------------------------------------------------------------------------|
| Hisactophilin                           | 118 | 0                    | Yes | Monomer | Tartaglia et al., Sawle et al., Ouyang et al.                                   |
| S16 (Meso)                              | 119 | 0                    | No  | Monomer | Sawle et al.                                                                    |
| CheY (Thermo)                           | 120 | 0                    | Yes | Monomer | Sawle et al.                                                                    |
| Apo pseudoazurin                        | 123 | 0                    | Yes | Monomer | Tartaglia et al., Ouyang et al.                                                 |
| Baboon $\alpha$ -Lactalbumin            | 123 | 0                    | Yes | Monomer | Sawle et al.                                                                    |
| Goat $\alpha$ -lactalbumin              | 124 | 0                    | Yes | Monomer | Tartaglia et al., Ouyang et al.                                                 |
| Rnase B / RNase A                       | 124 | 0                    | Yes | Monomer | Sawle et al.                                                                    |
| Villin 14T                              | 126 | 0                    | Yes | Monomer | Galzitskaya et al., Jackson                                                     |
| Ileal lipid binding protein             | 127 | 0                    | Yes | Monomer | Galzitskaya et al., Tartaglia et al., Ouyang et al.                             |
| CheY (Meso)                             | 128 | 0                    | Yes | Monomer | Galzitskaya et al., Jackson, Tartaglia et al., Sawle et al., Ouyang et al.      |
| Lysozyme                                | 129 | 0                    | Yes | Monomer | Jackson, Tartaglia et al., Sawle et al., Ouyang et al.                          |
| IFABP (from rat)                        | 132 | 0                    | Yes | Monomer | Galzitskaya et al., Tartaglia et al., Ouyang et al.                             |
| CRBP II                                 | 134 | 0                    | Yes | Monomer | Galzitskaya et al., Tartaglia et al., Ouyang et al.                             |
| CRABP I                                 | 136 | 0                    | Yes | Monomer | Galzitskaya et al.                                                              |
| Metmyoglobin (carp)                     | 147 | 0                    | No  | Monomer | Sawle et al.                                                                    |
| Odorant Binding Protein                 | 149 | 0                    | Yes | Monomer | Sawle et al.                                                                    |
| PsbQ                                    | 149 | 0                    | Yes | Monomer | Sawle et al.                                                                    |
| Staphylococcus Nuclease                 | 149 | 0                    | Yes | Monomer | Tartaglia et al., Sawle et al., Ouyang et al.                                   |
| glutamate dehydrogenase domain II       | 150 | 0                    | Yes | Monomer | Sawle et al.                                                                    |
| $\alpha$ -sarcin                        | 150 | 0                    | Yes | Monomer | Sawle et al.                                                                    |
| N1 CBD of CenC                          | 152 | 0                    | Yes | Monomer | Sawle et al.                                                                    |
| Metmyoglobin (horse)                    | 153 | 0                    | Yes | Monomer | Sawle et al.                                                                    |
| Myoglobin (whale)                       | 153 | 0                    | Yes | Monomer | Galzitskaya et al., Sawle et al., Tartaglia et al., Sawle et al., Ouyang et al. |
| Interleukin 1 $\beta$                   | 153 | 0                    | Yes | Monomer | Ouyang et al.                                                                   |
| Metmyoglobin (rat)                      | 154 | 0                    | No  | Monomer | Sawle et al.                                                                    |
| Metmyoglobin (opossum)                  | 154 | 0                    | No  | Monomer | Sawle et al.                                                                    |
| GroEL apical domain (191-345)           | 155 | 0                    | Yes | Monomer | Galzitskaya et al., Jackson, Tartaglia et al., Ouyang et al.                    |
| Ribonuclease HI                         | 155 | 0                    | Yes | Monomer | Galzitskaya et al., Jackson, Tartaglia et al., Sawle et al., Ouyang et al.      |
| P16 protein                             | 156 | 0                    | Yes | Monomer | Galzitskaya et al., Jackson, Tartaglia et al., Ouyang et al.                    |
| DHFR (dihydrofolate reductase)          | 159 | 0                    | Yes | Monomer | Galzitskaya et al., Tartaglia et al., Ouyang et al.                             |
| Bovine b-lactoglobulin                  | 162 | 0                    | Yes | Monomer | Tartaglia et al., Sawle et al., Ouyang et al.                                   |
| Phage T4 lysozyme                       | 164 | 0                    | Yes | Monomer | Galzitskaya et al., Tartaglia et al., Sawle et al., Ouyang et al.               |
| Cyclophilin A                           | 164 | 0                    | Yes | Monomer | Galzitskaya et al.                                                              |
| RNaseH (Thermo)                         | 166 | 0                    | Yes | Monomer | Sawle et al.                                                                    |
| flavodoxin                              | 168 | 0                    | Yes | Monomer | Sawle et al.                                                                    |
| MGMT                                    | 174 | 0                    | Yes | Monomer | Sawle et al.                                                                    |
| N-terminal domain from PGK              | 175 | 0                    | Yes | Monomer | Galzitskaya et al., Jackson, Tartaglia et al., Ouyang et al.                    |
| AdaC                                    | 180 | 0                    | Yes | Monomer | Sawle et al.                                                                    |
| Kunitz type soybean trypsin inhibitor   | 181 | 0                    | Yes | Monomer | Sawle et al.                                                                    |
| SRBP                                    | 182 | 0                    | Yes | Monomer | Sawle et al.                                                                    |
| Orosomucoid / Glycoprotein (AGP)        | 192 | 0                    | Yes | Monomer | Sawle et al.                                                                    |
| Endoglucanase 3                         | 218 | 0                    | Yes | Monomer | Sawle et al.                                                                    |
| villin 14T / C-terminal domain from PGK | 219 | 0                    | Yes | Monomer | Galzitskaya et al., Jackson, Tartaglia et al., Ouyang et al.                    |
| ADK (Yeast)                             | 220 | 0                    | Yes | Monomer | Sawle et al.                                                                    |
| Green fluorescent protein               | 238 | 0                    | Yes | Monomer | Tartaglia et al., Ouyang et al.                                                 |
| ApoLipoprotein A1                       | 243 | 0                    | Yes | Monomer | Sawle et al.                                                                    |
| a-Chymotrypsinogen                      | 245 | 0                    | Yes | Monomer | Sawle et al.                                                                    |
| EIN                                     | 258 | 0                    | Yes | Monomer | Sawle et al.                                                                    |
| Exo small $\beta$ -lactamase            | 265 | 0                    | Yes | Dimer   | Tartaglia et al., Sawle et al., Ouyang et al.                                   |
| Tryptophan synthase $\alpha$ -subunit   | 268 | 0                    | Yes | Monomer | Galzitskaya et al., Tartaglia et al., Ouyang et al.                             |
| Subtilisin BPN                          | 275 | 0                    | Yes | Monomer | Sawle et al.                                                                    |
| Arabinose Binding Protein               | 306 | 0                    | Yes | Monomer | Sawle et al.                                                                    |
| SBP (Apo) <sup>(A)</sup>                | 325 | 0 (1) <sup>(A)</sup> | No  | Monomer | Sawle et al.                                                                    |
| Transferrin                             | 337 | 0                    | Yes | Monomer | Sawle et al.                                                                    |
| Rhodopsin (bovine)                      | 349 | 7                    | Yes | Monomer | Sawle et al.                                                                    |
| maltose binding protein                 | 370 | 0                    | Yes | Monomer | Sawle et al.                                                                    |
| Tryptophan synthase $\beta$ 2-subunit   | 396 | 0                    | Yes | Monomer | Galzitskaya et al., Tartaglia et al., Ouyang et al.                             |
| YopM                                    | 454 | 0                    | Yes | Monomer | Sawle et al.                                                                    |
| Flagellin Monomer                       | 494 | 0                    | Yes | Monomer | Sawle et al.                                                                    |

|                |                    |            |                      |                  |                                |
|----------------|--------------------|------------|----------------------|------------------|--------------------------------|
| <b>Summary</b> | <b>&lt;200 aa:</b> | <b>147</b> | <b>at least 1 TM</b> | <b>PDB: 158</b>  | <b>Monomers: 160</b>           |
|                | <b>&gt;200 aa:</b> | <b>18</b>  | <b>helix: 1</b>      | <b>no PDB: 7</b> | <b>Dimers: 5</b>               |
|                |                    |            |                      |                  | <b>Trimers: 0</b>              |
|                |                    |            |                      |                  | <b>Tetramers: 0</b>            |
|                |                    |            |                      |                  | <b>Pentamers: 0</b>            |
|                |                    |            |                      |                  | <b>Hexamers: 0</b>             |
|                |                    |            |                      |                  | <b>&gt;Hexamers: 0</b>         |
|                |                    |            |                      |                  | <b>unspecific oligomers: 0</b> |

<sup>(A)</sup> Predicted transmembrane helix appears to be false positive.
