# Supplementary material
Source: PubMed Central journal article supplement (PMC3691291)
Supplement: NIHMS479824-supplement-02.pdf [file NIHMS479824-supplement-02.pdf]

## Kinetically stable proteins

References: Park C, Zhou S, Gilmore J, Marqusee S, J. Mol. Biol, 2007, 368 (5), 1426-37  
Xia K, Manning M, Hesham H, Lin Q, Bystroff C, Colón W, PNAS, 2007, 104 (44), 17329-34

| Protein name                                            | sequence length (aa) | TMHs (TMHMM)? | Has PDB? | PDB ID | signal sequence? | multimerization? | DnaK or GroEL substrate? | Reference               |
|---------------------------------------------------------|----------------------|---------------|----------|--------|------------------|------------------|--------------------------|-------------------------|
| Ecotin                                                  | 142                  | No            | Yes      | 1ECY   | Yes              | Dimer            | No                       | Park et al.             |
| Outer membrane protein OmpX                             | 148                  | No            | Yes      | 1QJ8   | Yes              | Trimer           | No                       | Xia et al.              |
| (3R)-hydroxymyristoyl ACP dehydratase                   | 151                  | No            | No       |        | No               | Hexamer          | No                       | Xia et al.              |
| Xanthine guanine phosphoribosyltransferase              | 152                  | No            | Yes      | 1NUL   | No               | Tetramer         | No                       | Xia et al.              |
| Bacterioferritin                                        | 158                  | No            | Yes      | 1BCF   | No               | 24-mer           | No                       | Park et al., Xia et al. |
| DNA protection during starvation protein                | 166                  | No            | Yes      | 1DPS   | No               | 12-mer           | No                       | Park et al.             |
| Inorganic phosphatase                                   | 175                  | No            | Yes      | 1JFD   | No               | Hexamer          | No                       | Park et al., Xia et al. |
| Alkyl hydroperoxide reductase, C22 subunit              | 187                  | No            | Yes      | 1YEP   | No               | 10-mer           | No                       | Xia et al.              |
| Phosphoheptose isomerase                                | 192                  | No            | No       |        | No               | Tetramer         | No                       | Xia et al.              |
| Superoxide dismutase (Fe)                               | 192                  | No            | Yes      | 1ISA   | No               | Dimer            | No                       | Park et al., Xia et al. |
| Modulator of drug activity B (MdaB)                     | 204                  | No            | Yes      | 2AMJ   | No               | Dimer            | No                       | Xia et al.              |
| Superoxide dismutase (Mn)                               | 205                  | No            | Yes      | 1D5N   | No               | Dimer            | No                       | Park et al.             |
| 30S ribosomal protein S4                                | 206                  | No            | Yes      | 1VS5   | No               | 21-mer           | No                       | Xia et al.              |
| ycaC                                                    | 208                  | No            | Yes      | 1YAC   | No               | 8-mer            | Yes                      | Park et al.             |
| Class B acid phosphatase                                | 212                  | No            | Yes      | 1N8N   | Yes              | Tetramer         | No                       | Park et al.             |
| Chloramphenicol acetyltransferase                       | 219                  | No            | Yes      | 1NOG   | No               | Trimer           | No                       | Xia et al.              |
| Arginine-binding protein 1                              | 224                  | No            | No       |        | Yes              | Monomer          | No                       | Park et al.             |
| Arginine-binding protein 2                              | 224                  | No            | No       |        | Yes              | Monomer          | No                       | Park et al.             |
| Ribulose phosphate 3-epimerase                          | 225                  | No            | No       |        | No               | N/A              | No                       | Park et al.             |
| Glutamine-binding periplasmic protein                   | 226                  | No            | Yes      | 1WDN   | Yes              | Monomer          | No                       | Park et al.             |
| LAO-binding periplasmic protein                         | 238                  | No            | No       |        | Yes              | Monomer          | No                       | Park et al.             |
| Purine nucleoside phosphorylase                         | 238                  | No            | Yes      | 1A69   | No               | Hexamer          | No                       | Park et al., Xia et al. |
| Pyridoxine 5 -phosphate synthase                        | 242                  | No            | Yes      | 1HO1   | No               | 8-mer            | No                       | Xia et al.              |
| Hypothetical UPF0135 protein ybgl                       | 247                  | No            | Yes      | 1NMO   | No               | Hexamer          | No                       | Park et al.             |
| Uridine phosphorylase                                   | 252                  | No            | Yes      | 1K3F   | No               | Hexamer          | No                       | Park et al., Xia et al. |
| Triosephosphate isomerase Tim                           | 255                  | No            | Yes      | 1TRE   | No               | Dimer            | No                       | Park et al., Xia et al. |
| Deoxyriboaldolase                                       | 259                  | No            | Yes      | 1JCL   | No               | Dimer            | No                       | Park et al.             |
| Enoyl reductase                                         | 261                  | No            | Yes      | 1DFG   | No               | Tetramer         | No                       | Xia et al.              |
| Ribose binding periplasmic protein                      | 271                  | No            | Yes      | 2DRI   | Yes              | Monomer          | Yes                      | Park et al.             |
| Protein L12                                             | 272                  | No            | Yes      | 2AW4   | No               | 31-mer           | No                       | Xia et al.              |
| Hypothetical oxidoreductase, yghA                       | 294                  | No            | No       |        | No               | N/A              | No                       | Park et al.             |
| Cytidine deaminase                                      | 294                  | No            | Yes      | 1CTT   | No               | Dimer            | No                       | Park et al.             |
| Agmatinase                                              | 306                  | No            | No       |        | No               |                  | No                       | Park et al.             |
| Transaldolase                                           | 317                  | No            | Yes      | 1UCW   | No               | Monomer          | No                       | Xia et al.              |
| Reduced thioredoxin reductase                           | 320                  | No            | Yes      | 1CL0   | No               | Dimer            | No                       | Xia et al.              |
| RNA polymerase alpha-subunit N-terminal domain          | 329                  | No            | Yes      | 1BDF   | No               | Dimer            | No                       | Xia et al.              |
| Glyceraldehyde-3-phosphate dehydrogenase A              | 330                  | No            | Yes      | 1GAD   | No               | Tetramer         | No                       | Park et al., Xia et al. |
| Glycerophosphoryl diester phosphodiesterase             | 336                  | No            | Yes      | 1T8Q   | Yes              | Dimer            | No                       | Xia et al.              |
| Ompf porin                                              | 340                  | No            | Yes      | 1HXX   | Yes              | Trimer           | Yes                      | Xia et al.              |
| Putrescine-binding protein                              | 344                  | No            | Yes      | 1A99   | Yes              | Monomer          | No                       | Park et al.             |
| Galactitol-1-phosphate dehydrogenase                    | 346                  | No            | No       |        | No               | N/A              | No                       | Xia et al.              |
| yahK (alcohol dehydrogenase-like)                       | 349                  | No            | Yes      | 1UUF   | No               | Dimer            | No                       | Park et al.             |
| Fructose-bisphosphate aldolase                          | 350                  | No            | No       |        | No               | N/A              | Yes                      | Xia et al.              |
| Putative receptor                                       | 353                  | No            | No       |        | Yes              | N/A              | No                       | Xia et al.              |
| Putative periplasmic binding protein, ydcS              | 359                  | No            | No       |        | Yes              | N/A              | No                       | Park et al.             |
| Maltose binding protein                                 | 370                  | No            | Yes      | 1ANF   | Yes              | Monomer          | No                       | Park et al.             |
| Periplasmic glycerophosphoryl diester phosphodiesterase | 371                  | Yes           | Yes      | 1YDY   | Yes              | Dimer            | No                       | Xia et al.              |
| Hypothetical protein UTI89 C2371                        | 374                  | No            | No       |        | No               | N/A              | No                       | Xia et al.              |
| S-adenosylmethionine synthetase                         | 383                  | No            | Yes      | 1XRB   | No               | Dimer            | Yes                      | Xia et al.              |
| Phosphoglycerate kinase                                 | 386                  | No            | No       |        | No               | Monomer          | No                       | Park et al.             |
| Isoaspartyl dipeptidase                                 | 390                  | No            | Yes      | 1YBQ   | No               | 8-mer            | No                       | Xia et al.              |
| Glucose-1-phosphatase                                   | 391                  | No            | Yes      | 1NT4   | Yes              | Dimer            | No                       | Park et al.             |
| Elongation factor, Tu                                   | 393                  | No            | Yes      | 1D8T   | No               | Monomer          | No                       | Xia et al.              |

|                                          |     |     |     |      |     |          |     |                         |
|------------------------------------------|-----|-----|-----|------|-----|----------|-----|-------------------------|
| Aspartate aminotransferase               | 396 | No  | Yes | 1AAW | No  | Dimer    | No  | Park et al.             |
| 2-Amino-3-ketobutyrate CoA ligase        | 401 | No  | Yes | 1FC4 | No  | Dimer    | No  | Xia et al.              |
| beta-Ketoacyl-acyl synthase li           | 412 | No  | Yes | 2GFW | No  | Dimer    | Yes | Xia et al.              |
| Transcription termination factor Rho     | 419 | No  | Yes | 1PVO | No  | 12-mer   | No  | Xia et al.              |
| Maltoporin Lamb                          | 421 | No  | Yes | 1MAL | Yes | Trimer   | No  | Xia et al.              |
| Fructose-bisphosphate aldolase class II  | 421 | No  | Yes | 1ZEN | No  | Dimer    | No  | Xia et al.              |
| Peptidase B                              | 427 | No  | No  |      | No  | Hexamer  | No  | Park et al.             |
| Outer membrane protein TolC              | 428 | No  | Yes | 1EK9 | Yes | Trimer   | Yes | Xia et al.              |
| Proline dipeptidase                      | 443 | No  | No  |      | No  | N/A      | Yes | Xia et al.              |
| Glutathione reductase                    | 450 | No  | Yes | 1GET | No  | Dimer    | No  | Park et al.             |
| Glutamine synthetase                     | 469 | No  | Yes | 2GLS | No  | 12-mer   | No  | Xia et al.              |
| Pyruvate kinase I                        | 470 | No  | Yes | 1PKY | No  | Tetramer | No  | Park et al.             |
| Dihydrolipoyl dehydrogenase              | 473 | No  | No  |      | No  | Dimer    | No  | Park et al., Xia et al. |
| Predicted GTPase                         | 490 | No  | No  |      | No  | N/A      | No  | Xia et al.              |
| Aspartate ammonia-lyase (aspartase)      | 493 | No  | Yes | 1JSW | No  | Tetramer | No  | Xia et al.              |
| Leucyl aminopeptidase                    | 503 | No  | Yes | 1GYT | No  | Hexamer  | No  | Xia et al.              |
| Periplasmic oligopeptide-binding protein | 517 | Yes | No  |      | Yes | Monomer  | No  | Park et al.             |
| UDP-sugar hydrolase (5'-nucleotidase)    | 525 | No  | Yes | 1HPI | Yes | Monomer  | No  | Park et al.             |
| Trehalase                                | 535 | No  | No  |      | Yes | Monomer  | No  | Park et al.             |
| Glycerol kinase                          | 537 | No  | Yes | 1GLA | No  | 8-mer    | No  | Xia et al.              |
| Phosphoenolpyruvate carboxykinase        | 540 | No  | Yes | 1AYL | No  | Monomer  | No  | Park et al.             |
| GroEL                                    | 548 | No  | Yes | 2EU1 | No  | 7-mer    | No  | Xia et al.              |
| Unnamed protein                          | 549 | No  | No  |      | No  | Dimer    | No  | Xia et al.              |
| L-fucose isomerase                       | 591 | No  | Yes | 1FUI | No  | Trimer   | No  | Xia et al.              |
| Elongation factor EF-2                   | 704 | No  | No  |      | No  | Monomer  | No  | Xia et al.              |
| Catalase; hydroperoxidase HPI(I)         | 726 | No  | No  |      | No  | Dimer    | Yes | Xia et al.              |
| Unnamed protein                          | 733 | No  | Yes | 1ZO1 | No  | Dimer    | No  | Xia et al.              |
| Catalase HPII                            | 753 | No  | Yes | 1GGE | No  | Tetramer | No  | Park et al.             |

|         |             |             |            |               |                         |                         |
|---------|-------------|-------------|------------|---------------|-------------------------|-------------------------|
| Summary | <200 aa: 10 | at least 1  | PDB: 58    | sig. seq.: 21 | Monomers: 15            | Chaperone substrates: 9 |
|         | >200 aa: 71 | TM helix: 2 | no PDB: 23 |               | no sig. seq.: 60        |                         |
|         |             |             |            |               | Trimers: 6              |                         |
|         |             |             |            |               | Tetramers: 8            |                         |
|         |             |             |            |               | Pentamers: 0            |                         |
|         |             |             |            |               | Hexamers: 7             |                         |
|         |             |             |            |               | >Hexamers: 12           |                         |
|         |             |             |            |               | unspecific oligomers: 0 |                         |
