# Supplementary material
Source: PubMed Central journal article supplement (PMC3691291)
Supplement: NIHMS479824-supplement-03.pdf [file NIHMS479824-supplement-03.pdf]

## Chaperone client proteins

References: Fujiwara K, Ishihama Y, Nakahigashi K, Soga T, Taguchi H, EMBO J., 2010, 29 (9), 1552-64  
Calloni G, Chen T, Schermann SM, Chang HC, Genevoux P, Agostini F, Tartaglia GG, Hayer-Hartl M, Hartl FU, Cell Rep., 2012, 1 (3), 251-64

| Protein name                                                                     | RefSeqID    | geneID | sequence length (aa) | # of TMHs (TMHMM)? | Has PDB? | signal sequence? | multimerization? | DnaK substrate? | GroEL substrate? | Reference                       |
|----------------------------------------------------------------------------------|-------------|--------|----------------------|--------------------|----------|------------------|------------------|-----------------|------------------|---------------------------------|
| IS186 transposase                                                                | NP_414557.1 | insL   | 370                  | 0                  | No       | No               | N/A              | Yes             | No               | Calloni et al.                  |
| L-arabinose isomerase                                                            | NP_414604.1 | araA   | 500                  | 0                  | Yes      | No               | Hexamer          | No              | Yes              | Fujiwara et al.                 |
| GTP-binding tubulin-like cell division protein                                   | NP_414637.1 | ftsZ   | 383                  | 0                  | No       | No               | Dimer            | Yes             | No               | Calloni et al.                  |
| conserved protein                                                                | NP_414644.1 | yacF   | 247                  | 0                  | No       | No               | N/A              | Yes             | No               | Calloni et al.                  |
| carbonic anhydrase                                                               | NP_414668.1 | can    | 220                  | 0                  | Yes      | No               | Dimer            | Yes             | No               | Calloni et al.                  |
| tetraacyldisaccharide-1-P synthase                                               | NP_414724.1 | lpxB   | 382                  | 0                  | No       | No               | N/A              | Yes             | No               | Calloni et al.                  |
| ribonuclease HII, degrades RNA of DNA-RNA hybrids                                | NP_414725.1 | rhbB   | 198                  | 0                  | No       | No               | N/A              | Yes             | No               | Calloni et al.                  |
| DL-methionine transporter subunit                                                | NP_414741.1 | metN   | 343                  | 0                  | Yes      | No               | Pentamer         | Yes             | No               | Calloni et al.                  |
| conserved protein                                                                | NP_414745.1 | yafD   | 266                  | 0                  | No       | No               | N/A              | No              | Yes              | Fujiwara et al.                 |
| antitoxin of YafQ-DinJ toxin-antitoxin system                                    | NP_414761.1 | dinJ   | 86                   | 0                  | No       | No               | Tetramer         | Yes             | No               | Calloni et al.                  |
| IS5 transposase and trans-activator                                              | NP_414793.1 | insH   | 338                  | 0                  | No       | No               | N/A              | Yes             | No               | Calloni et al.                  |
| alcohol dehydrogenase class III/glutathione-dependent formaldehyde dehydrogenase | NP_414890.1 | frmA   | 369                  | 0                  | No       | No               | Dimer            | Yes             | No               | Calloni et al.                  |
| dehydratase (porphobilinogen synthase)                                           | NP_414903.4 | hemB   | 324                  | 0                  | Yes      | No               | >Hexamer         | No              | Yes              | Fujiwara et al.                 |
| exonuclease, dsDNA, ATP-dependent                                                | NP_414932.1 | sbcD   | 400                  | 0                  | No       | No               | Dimer            | Yes             | No               | Calloni et al.                  |
| conserved protein                                                                | NP_414938.1 | acpH   | 193                  | 0                  | No       | No               | N/A              | No              | Yes              | Fujiwara et al.                 |
| conserved protein                                                                | NP_414947.1 | nrdR   | 149                  | 0                  | No       | No               | N/A              | Yes             | No               | Calloni et al.                  |
| 2-carboxybenzaldehyde reductase, function unknown                                | NP_414953.2 | yajO   | 324                  | 0                  | No       | No               | N/A              | No              | Yes              | Fujiwara et al.                 |
| proteolytic subunit of ClpA-ClpP and ClpX-ClpP ATP-dependent serine proteases    | NP_414971.1 | clpP   | 207                  | 0                  | Yes      | No               | >Hexamer         | Yes             | No               | Calloni et al.                  |
| modulator of gene expression, with H-NS                                          | NP_414993.1 | hha    | 72                   | 0                  | Yes      | No               | N/A              | Yes             | No               | Calloni et al.                  |
| DNA-binding global transcriptional activator; DLP12 prophage                     | NP_415096.1 | appY   | 249                  | 0                  | No       | No               | N/A              | Yes             | No               | Calloni et al.                  |
| DLP12 prophage; outer membrane protease VII (outer membrane protein 3b)          | NP_415097.1 | ompT   | 317                  | 0                  | Yes      | Yes              | Pentamer         | Yes             | No               | Calloni et al.                  |
| isochorismate synthase 1                                                         | NP_415125.1 | entC   | 391                  | 0                  | Yes      | No               | Monomer          | Yes             | No               | Calloni et al.                  |
| isochorismatase                                                                  | NP_415127.1 | entB   | 285                  | 0                  | Yes      | No               | Tetramer         | Yes             | No               | Calloni et al.                  |
| lipote synthase                                                                  | NP_415161.1 | lipA   | 321                  | 0                  | No       | No               | N/A              | Yes             | Yes              | Fujiwara et al.                 |
| septal ring protein, suppressor of prc, minor                                    | NP_415166.1 | rlpA   | 362                  | 0                  | No       | No               | N/A              | Yes             | No               | Calloni et al.                  |
| tRNA-i(6)A37 methylthiotransferase                                               | NP_415194.1 | miaB   | 474                  | 0                  | No       | No               | Monomer          | Yes             | No               | Calloni et al.                  |
| succinate dehydrogenase, flavoprotein subunit                                    | NP_415251.1 | sdhA   | 588                  | 0                  | Yes      | No               | Tetramer         | Yes             | Yes              | Fujiwara et al., Calloni et al. |
| 8-amino-7-oxononanoate synthase                                                  | NP_415297.1 | bioF   | 384                  | 0                  | Yes      | No               | Dimer            | No              | Yes              | Fujiwara et al.                 |
| malonyl-CoA methyltransferase, SAM-dependent                                     | NP_415298.1 | bioC   | 251                  | 0                  | No       | No               | N/A              | Yes             | No               | Calloni et al.                  |
| dethiobiotin synthetase                                                          | NP_415299.1 | bioD   | 225                  | 0                  | Yes      | No               | Dimer            | Yes             | No               | Calloni et al.                  |
| molybdopterin biosynthesis protein A                                             | NP_415302.1 | moaA   | 329                  | 0                  | No       | No               | N/A              | Yes             | No               | Calloni et al.                  |
| molybdopterin biosynthesis, protein C                                            | NP_415304.1 | moaC   | 161                  | 0                  | Yes      | No               | Hexamer          | Yes             | No               | Calloni et al.                  |
| glutamine transporter subunit                                                    | NP_415330.1 | glnQ   | 240                  | 0                  | No       | No               | Tetramer         | Yes             | No               | Calloni et al.                  |
| L,D-transpeptidase linking Lpp to murein                                         | NP_415340.1 | ybiS   | 306                  | 1                  | No       | Yes              | N/A              | Yes             | No               | Calloni et al.                  |
| molybdopterin synthase sulfurlyase                                               | NP_415347.1 | moeB   | 249                  | 0                  | Yes      | No               | Dimer            | Yes             | No               | Calloni et al.                  |
| ribosomal protein S12 methylthiotransferase; radical SAM superfamily             | NP_415356.1 | rimO   | 441                  | 0                  | No       | No               | N/A              | Yes             | No               | Calloni et al.                  |
| FMN and erythrose-4-P phosphatase                                                | NP_415365.4 | ybjI   | 271                  | 0                  | No       | No               | N/A              | Yes             | No               | Calloni et al.                  |
| putrescine transporter subunit: ATP-binding component of ABC                     | NP_415376.4 | potG   | 377                  | 0                  | No       | No               | N/A              | Yes             | No               | Calloni et al.                  |
| oxidoreductase with NAD(P)-binding Rossmann-fold domain                          | NP_415389.2 | ybiS   | 337                  | 0                  | No       | No               | N/A              | No              | Yes              | Fujiwara et al.                 |
| L-allo-threonine aldolase, PLP-dependent                                         | NP_415391.1 | ltaE   | 333                  | 0                  | No       | No               | Tetramer         | No              | Yes              | Fujiwara et al.                 |

|                                                                             |             |             |      |   |     |     |          |     |     |                                    |
|-----------------------------------------------------------------------------|-------------|-------------|------|---|-----|-----|----------|-----|-----|------------------------------------|
| conserved protein                                                           | NP_415398.1 | ybiX        | 330  | 0 | No  | No  | N/A      | Yes | No  | Calloni et al.                     |
| ring sorting daughter chromosomes                                           | NP_415410.1 | ftsK        | 1329 | 5 | No  | No  | Hexamer  | Yes | No  | Calloni et al.                     |
| predicted hydrolase, isochorismatase family                                 | NP_415417.1 | ycaC        | 208  | 0 | Yes | No  | >Hexamer | Yes | No  | Calloni et al.                     |
| 3-phosphoserine/phosphohydroxythreonine aminotransferase                    | NP_415427.1 | serC        | 362  | 0 | Yes | No  | Dimer    | No  | Yes | Fujiwara et al.                    |
| conserved protein, UPF0434 family                                           | NP_415437.1 | ycaR        | 60   | 0 | No  | No  | N/A      | Yes | No  | Calloni et al.                     |
| outer membrane porin 1a (Ia;B;F)                                            | NP_415449.1 | ompF        | 362  | 0 | Yes | Yes | Trimer   | Yes | No  | Calloni et al.                     |
| dihydro-orotate oxidase, FMN-linked                                         | NP_415465.1 | pyrD        | 336  | 0 | Yes | No  | Monomer  | No  | Yes | Fujiwara et al.                    |
| phosphotyrosine-protein phosphatase                                         | NP_415502.4 | etp         | 148  | 0 | No  | No  | N/A      | Yes | No  | Calloni et al.                     |
| DNA-binding response regulator in two-component regulatory system with TorS | NP_415515.1 | torR        | 230  | 0 | No  | No  | N/A      | Yes | No  | Calloni et al.                     |
| curved DNA-binding protein, DnaJ homologue that functions as a co-chaperone | NP_415520.1 | cbpA        | 306  | 0 | No  | No  | N/A      | Yes | No  | Calloni et al.                     |
| curli production assembly/transport outer membrane lipoprotein              | NP_415555.1 | csgG        | 277  | 0 | No  | Yes | N/A      | Yes | No  | Calloni et al.                     |
| DNA-binding transcriptional activator for csgBA                             | NP_415558.1 | csgD        | 216  | 0 | No  | No  | N/A      | Yes | No  | Calloni et al.                     |
| predicted rhodanese-related sulfurtransferase                               | NP_415573.1 | yceA        | 350  | 0 | No  | No  | N/A      | Yes | No  | Calloni et al.                     |
| dihydro-orotase                                                             | NP_415580.1 | pyrC        | 348  | 0 | Yes | No  | Dimer    | Yes | Yes | Fujiwara et al.,<br>Calloni et al. |
| anti-sigma factor for FliA (sigma 28)                                       | NP_415589.1 | flgM        | 97   | 0 | No  | No  | N/A      | Yes | No  | Calloni et al.                     |
| 3-oxoacyl-[acyl-carrier-protein] synthase II                                | NP_415613.1 | fabF        | 413  | 0 | Yes | No  | Dimer    | No  | Yes | Fujiwara et al.                    |
| predicted DNase                                                             | NP_415618.1 | ycfH        | 265  | 0 | Yes | No  | N/A      | No  | Yes | Fujiwara et al.                    |
| outer membrane lipoprotein                                                  | NP_415623.1 | ycfM (lpoB) | 213  | 0 | No  | Yes | N/A      | Yes | No  | Calloni et al.                     |
| beta N-acetyl-                                                              | NP_415625.1 | naqZ        | 341  | 0 | No  | No  | Monomer  | No  | Yes | Fujiwara et al.                    |
| outer membrane-specific lipoprotein transporter subunit                     | NP_415635.4 | lolD        | 233  | 0 | No  | No  | Tetramer | Yes | No  | Calloni et al.                     |
| membrane ATPase of the MinC-MinD-MinE system                                | NP_415693.1 | minD        | 270  | 0 | Yes | No  | N/A      | Yes | No  | Calloni et al.                     |
| predicted protein                                                           | NP_415696.1 | ycgK (pliG) | 133  | 0 | Yes | Yes | N/A      | Yes | No  | Calloni et al.                     |
| D-amino acid dehydrogenase                                                  | NP_415707.1 | dadA        | 432  | 0 | No  | No  | Dimer    | No  | Yes | Fujiwara et al.                    |
| alanine racemase 2, PLP-binding                                             | NP_415708.1 | dadX        | 356  | 0 | No  | No  | N/A      | No  | Yes | Fujiwara et al.                    |
| octulosonate 8-phosphate synthase                                           | NP_415733.1 | kdsA        | 284  | 0 | Yes | No  | Trimer   | No  | Yes | Fujiwara et al.                    |
| nitrate reductase 1, alpha subunit                                          | NP_415742.1 | narG        | 1247 | 0 | Yes | No  | Hexamer  | Yes | No  | Calloni et al.                     |
| conserved protein, UPF0225 family                                           | NP_415749.1 | yehJ        | 152  | 0 | No  | No  | N/A      | Yes | No  | Calloni et al.                     |
| thymidine kinase/deoxyuridine kinase                                        | NP_415754.1 | tdk         | 205  | 0 | No  | No  | Tetramer | Yes | No  | Calloni et al.                     |
| oligopeptide transporter subunit                                            | YP_025300.1 | oppD        | 337  | 0 | No  | No  | N/A      | Yes | No  | Calloni et al.                     |
| membrane spanning protein in TonB-ExbB-ExbD transport complex               | NP_415768.1 | tonB        | 239  | 0 | No  | No  | Dimer    | Yes | No  | Calloni et al.                     |
| outer membrane protein W                                                    | NP_415772.1 | ompW        | 212  | 0 | Yes | Yes | N/A      | Yes | No  | Calloni et al.                     |
| DNA:cysteine-protein methyltransferase                                      | NP_415851.1 | ogt         | 171  | 0 | No  | No  | N/A      | Yes | No  | Calloni et al.                     |
| tRNA 2-thiocytidine biosynthesis protein                                    | NP_415860.1 | ttcA        | 311  | 0 | No  | No  | N/A      | Yes | No  | Calloni et al.                     |
| Rac prophage; recombination and repair protein                              | NP_415865.1 | recT        | 269  | 0 | No  | No  | Tetramer | Yes | No  | Calloni et al.                     |
| predicted DNA-binding transcriptional regulator                             | NP_415939.2 | ydcl        | 307  | 0 | No  | No  | N/A      | Yes | No  | Calloni et al.                     |
| predicted peptidase                                                         | NP_415952.2 | ydcP        | 653  | 0 | No  | No  | N/A      | Yes | No  | Calloni et al.                     |
| glutamate decarboxylase B, PLP-dependent                                    | NP_416010.1 | gadB        | 466  | 0 | Yes | No  | Hexamer  | Yes | No  | Calloni et al.                     |
| putative autoinducer-2 (AI-2) aldolase                                      | NP_416034.1 | yneB (IsrF) | 291  | 0 | Yes | No  | N/A      | No  | Yes | Fujiwara et al.                    |
| bifunctional D-altronate/D-mannonate dehydratase                            | NP_416098.1 | rspA        | 404  | 0 | No  | No  | N/A      | No  | Yes | Fujiwara et al.                    |
| predicted protein                                                           | NP_416121.1 | ydgH        | 314  | 0 | No  | Yes | N/A      | Yes | No  | Calloni et al.                     |
| adenosine deaminase                                                         | NP_416140.1 | add         | 333  | 0 | No  | No  | N/A      | No  | Yes | Fujiwara et al.                    |

|                                                                                                                          |             |             |      |   |     |     |          |     |     |                                 |
|--------------------------------------------------------------------------------------------------------------------------|-------------|-------------|------|---|-----|-----|----------|-----|-----|---------------------------------|
| electron transport complex protein required for the reduction of SoxR; predicted membrane-associated NADH oxidoreductase | NP_416146.1 | rsxC        | 740  | 0 | No  | No  | Hexamer  | Yes | No  | Calloni et al.                  |
| electron transport complex protein required for the reduction of SoxR                                                    | NP_416148.1 | rsxG        | 206  | 0 | No  | Yes | Hexamer  | Yes | No  | Calloni et al.                  |
| cysteine desulfurase, stimulated by SufE; selenocysteine lyase, PLP-dependent                                            | NP_416195.1 | csdB (sufS) | 406  | 0 | Yes | No  | Dimer    | No  | Yes | Fujiwara et al.                 |
| predicted FAD-linked oxidoreductase                                                                                      | NP_416202.1 | ydiJ        | 1018 | 0 | No  | No  | N/A      | Yes | No  | Calloni et al.                  |
| subunit : ATP-binding component of ABC superfamily                                                                       | NP_416224.1 | btuD        | 249  | 0 | Yes | No  | Pentamer | Yes | No  | Calloni et al.                  |
| threonyl-tRNA synthetase                                                                                                 | NP_416234.1 | thrS        | 642  | 0 | Yes | No  | Dimer    | Yes | No  | Calloni et al.                  |
| catalase HP11, heme d-containing                                                                                         | YP_025308.1 | katE        | 753  | 0 | Yes | No  | Tetramer | Yes | No  | Calloni et al.                  |
| glutamate dehydrogenase, NADP-specific                                                                                   | NP_416275.1 | gdhA        | 447  | 0 | Yes | No  | Hexamer  | No  | Yes | Fujiwara et al.                 |
| diguanylate cyclase                                                                                                      | NP_416308.4 | yeaP        | 341  | 0 | No  | No  | Dimer    | Yes | No  | Calloni et al.                  |
| fused mannose-specific PTS enzymes: IIA component/IIB component                                                          | NP_416331.1 | manX        | 323  | 0 | No  | No  | N/A      | Yes | No  | Calloni et al.                  |
| 23S rRNA m(1)G745 methyltransferase                                                                                      | NP_416336.1 | rlmA        | 269  | 0 | Yes | No  | Dimer    | Yes | No  | Calloni et al.                  |
| DNA polymerase III, theta subunit                                                                                        | NP_416356.1 | holE        | 76   | 0 | Yes | No  | >Hexamer | Yes | No  | Calloni et al.                  |
| DNA exonuclease X                                                                                                        | NP_416358.1 | exoX        | 220  | 0 | No  | No  | N/A      | Yes | No  | Calloni et al.                  |
| zinc transporter subunit: periplasmic-binding component of ABC                                                           | NP_416371.4 | znuA        | 310  | 0 | Yes | Yes | N/A      | Yes | No  | Calloni et al.                  |
| zinc transporter subunit: ATP-binding component of ABC superfamily                                                       | NP_416372.1 | znuC        | 251  | 0 | No  | No  | Pentamer | Yes | No  | Calloni et al.                  |
| ATP-dependent DNA helicase, component of RuvABC resolvosome                                                              | NP_416374.1 | ruvB        | 336  | 0 | No  | No  | >Hexamer | Yes | No  | Calloni et al.                  |
| DNA-binding response regulator in two-component regulatory system with BarA                                              | NP_416424.1 | uvrY        | 218  | 0 | No  | No  | N/A      | Yes | No  | Calloni et al.                  |
| predicted transporter subunit: ATP-binding component of ABC superfamily                                                  | NP_416427.1 | yecC        | 250  | 0 | No  | No  | N/A      | Yes | No  | Calloni et al.                  |
| dTDP-4-deoxyribose-3,5-epimerase                                                                                         | NP_416542.1 | rbcC        | 185  | 0 | No  | No  | Dimer    | No  | Yes | Fujiwara et al.                 |
| uridine/cytidine kinase                                                                                                  | NP_416570.2 | udk         | 213  | 0 | No  | No  | Tetramer | Yes | No  | Calloni et al.                  |
| D-tagatose 1,6-bisphosphate aldolase 2, subunit                                                                          | NP_416598.1 | gatZ        | 420  | 0 | Yes | No  | Dimer    | Yes | No  | Calloni et al.                  |
| D-tagatose 1,6-bisphosphate aldolase 2, catalytic subunit                                                                | NP_416599.2 | gatY        | 284  | 0 | No  | No  | Dimer    | No  | Yes | Fujiwara et al.                 |
| fructose-bisphosphate aldolase class I                                                                                   | NP_416600.4 | fbaB        | 350  | 0 | No  | No  | >Hexamer | No  | Yes | Fujiwara et al.                 |
| FAD-binding, NADH independent                                                                                            | NP_416637.1 | dld         | 571  | 0 | Yes | No  | N/A      | Yes | No  | Calloni et al.                  |
| tRNA-dihydrouridine synthase C                                                                                           | NP_416645.1 | dusC        | 315  | 0 | No  | No  | N/A      | No  | Yes | Fujiwara et al.                 |
| endonuclease IV with intrinsic 3'-5' exonuclease activity                                                                | NP_416664.1 | nfo         | 285  | 0 | Yes | No  | Monomer  | No  | Yes | Fujiwara et al.                 |
| DNA-binding response regulator in two-component regulatory system with NarQ or NarX                                      | NP_416697.1 | narP        | 215  | 0 | No  | No  | N/A      | Yes | No  | Calloni et al.                  |
| outer membrane porin protein C                                                                                           | NP_416719.1 | ompC        | 367  | 0 | Yes | Yes | Trimer   | Yes | No  | Calloni et al.                  |
| conserved protein, acid-induced                                                                                          | NP_416740.1 | inaA        | 216  | 0 | No  | No  | N/A      | Yes | No  | Calloni et al.                  |
| NADH:ubiquinone oxidoreductase, chain G                                                                                  | NP_416786.4 | nuoG        | 908  | 0 | No  | No  | >Hexamer | Yes | No  | Calloni et al.                  |
| NADH:ubiquinone oxidoreductase, chain E                                                                                  | NP_416788.1 | nuoE        | 166  | 0 | No  | No  | >Hexamer | Yes | No  | Calloni et al.                  |
| NADH:ubiquinone oxidoreductase, fused CD subunit                                                                         | NP_416789.2 | nuoC        | 596  | 0 | No  | No  | >Hexamer | Yes | Yes | Fujiwara et al., Calloni et al. |
| NADH:ubiquinone oxidoreductase, chain B                                                                                  | NP_416790.1 | nuoB        | 220  | 0 | No  | No  | >Hexamer | Yes | No  | Calloni et al.                  |
| valine-pyruvate aminotransferase 2                                                                                       | NP_416793.1 | yfbQ (alaA) | 405  | 0 | No  | No  | Dimer    | Yes | Yes | Fujiwara et al.                 |
| histidine/lysine/arginine/ornithine transporter subunit                                                                  | NP_416809.1 | hisP        | 257  | 0 | No  | No  | N/A      | Yes | No  | Calloni et al.                  |
| DNA-binding transcriptional dual regulator                                                                               | NP_416865.1 | dsdC        | 311  | 0 | No  | No  | N/A      | Yes | No  | Calloni et al.                  |

|                                                                                            |             |             |      |   |     |     |                     |     |     |                                    |
|--------------------------------------------------------------------------------------------|-------------|-------------|------|---|-----|-----|---------------------|-----|-----|------------------------------------|
| hybrid sensory histidine kinase in two-component regulatory system with EvgA               | NP_416871.1 | evgS        | 1197 | 0 | No  | Yes | N/A                 | Yes | No  | Calloni et al.                     |
| pyridoxal-pyridoxamine kinase/hydroxymethylpyrimidine kinase                               | NP_416913.1 | pdxK        | 283  | 0 | Yes | No  | N/A                 | Yes | No  | Calloni et al.                     |
| lyase, large subunit, heavy chain                                                          | NP_416936.4 | eutB        | 453  | 0 | Yes | No  | Dimer               | No  | Yes | Fujiwara et al.                    |
| dihydrodipicolinate synthase dependent and NAD(P)-binding                                  | NP_416973.1 | dapA        | 292  | 0 | Yes | No  | Tetramer            | No  | Yes | Fujiwara et al.                    |
| predicted DNA-binding transcriptional regulator                                            | NP_417040.2 | yphC        | 353  | 0 | No  | No  | N/A                 | Yes | No  | Calloni et al.                     |
| predicted DNA-binding transcriptional regulator                                            | NP_417045.4 | yphH        | 397  | 0 | No  | No  | N/A                 | Yes | No  | Calloni et al.                     |
| tRNA-specific adenosine deaminase                                                          | NP_417054.2 | tadA        | 167  | 0 | Yes | No  | Dimer               | Yes | No  | Calloni et al.                     |
| membrane-associated, 16S rRNA-binding GTPase                                               | NP_417061.1 | era         | 301  | 0 | Yes | No  | Monomer             | Yes | No  | Calloni et al.                     |
| back-translocating Elongation Factor EF4, GTPase                                           | NP_417064.1 | lepA        | 599  | 0 | Yes | No  | N/A                 | Yes | No  | Calloni et al.                     |
| quinolinate synthase, L-aspartate oxidase (B protein) subunit                              | NP_417069.1 | nadB        | 540  | 0 | Yes | No  | Monomer             | Yes | No  | Calloni et al.                     |
| predicted DNA-binding transcriptional regulator                                            | NP_417072.4 | yfiE        | 293  | 0 | No  | No  | N/A                 | Yes | No  | Calloni et al.                     |
| lipoprotein required for OM biogenesis, in BamABCDE complex                                | NP_417086.1 | bamD        | 245  | 0 | Yes | Yes | unspecific oligomer | Yes | No  | Calloni et al.                     |
| recombination and repair protein                                                           | YP_026172.1 | recN        | 553  | 0 | No  | No  | N/A                 | Yes | No  | Calloni et al.                     |
| CP4-57 prophage: RNase LS                                                                  | NP_417119.1 | rnlA        | 357  | 0 | No  | No  | N/A                 | Yes | No  | Calloni et al.                     |
| fructose-1-P and 6-phosphogluconate phosphatase                                            | NP_417175.1 | yqaB        | 188  | 0 | No  | No  | N/A                 | Yes | Yes | Fujiwara et al.,<br>Calloni et al. |
| DNA strand exchange and recombination protein with protease and nuclease activity          | NP_417179.1 | recA        | 353  | 0 | Yes | No  | N/A                 | Yes | No  | Calloni et al.                     |
| GTP hydrolase involved in nickel liganding into hydrogenases                               | NP_417207.1 | hypB        | 290  | 0 | No  | No  | N/A                 | Yes | No  | Calloni et al.                     |
| activator of AmiC murein hydrolase activity, lipoprotein                                   | NP_417222.1 | nlpD        | 379  | 0 | No  | Yes | N/A                 | Yes | No  | Calloni et al.                     |
| sulfate adenyltransferase, subunit 1                                                       | NP_417231.1 | cysN        | 475  | 0 | No  | No  | Dimer               | Yes | No  | Calloni et al.                     |
| reductase (NADPH-dependent)                                                                | NP_417274.1 | queF        | 282  | 0 | No  | No  | Dimer               | Yes | No  | Calloni et al.                     |
| DNA-binding transcriptional activator                                                      | NP_417285.1 | fucR        | 243  | 0 | No  | No  | N/A                 | Yes | Yes | Fujiwara et al.,<br>Calloni et al. |
| fused PTS enzyme: PEP-protein phosphotransferase (enzyme I)/GAF domain containing protein  | NP_417306.1 | ptsP        | 748  | 0 | No  | No  | N/A                 | Yes | No  | Calloni et al.                     |
| xanthine dehydrogenase, FAD-binding subunit                                                | NP_417343.1 | xdhB        | 292  | 0 | No  | No  | Trimer              | Yes | No  | Calloni et al.                     |
| ssDNA exonuclease, 5' --> 3'-specific                                                      | NP_417368.1 | recJ        | 577  | 0 | No  | No  | N/A                 | Yes | No  | Calloni et al.                     |
| 2-octaprenyl-6-methoxyphenol hydroxylase, FAD/NAD(P)-binding                               | NP_417383.1 | ubiH        | 392  | 0 | No  | No  | N/A                 | Yes | No  | Calloni et al.                     |
| DNA-binding transcriptional activator, replication initiation inhibitor                    | NP_417391.1 | argP        | 297  | 0 | No  | No  | N/A                 | No  | Yes | Fujiwara et al.                    |
| methylmalonyl-CoA decarboxylase, biotin-independent                                        | NP_417394.4 | scpB        | 261  | 0 | Yes | No  | Hexamer             | Yes | No  | Calloni et al.                     |
| S-adenosylmethionine synthetase                                                            | NP_417417.1 | metK        | 384  | 0 | Yes | No  | Tetramer            | No  | Yes | Fujiwara et al.                    |
| predicted oxidoreductase, HemN family                                                      | NP_417430.1 | yggW        | 378  | 0 | No  | No  | N/A                 | Yes | No  | Calloni et al.                     |
| hydrogenase 2 4Fe-4S ferredoxin-type component                                             | NP_417470.1 | hybA        | 328  | 0 | No  | Yes | N/A                 | Yes | No  | Calloni et al.                     |
| antitoxin for MqsR toxin; predicted transcriptional regulator                              | NP_417493.1 | ygiT (mqsA) | 131  | 0 | Yes | No  | Dimer               | Yes | No  | Calloni et al.                     |
| quorum sensing DNA-binding response regulator in two-component regulatory system with QseC | NP_417497.1 | qseB        | 219  | 0 | No  | No  | N/A                 | Yes | No  | Calloni et al.                     |
| transport channel                                                                          | NP_417507.2 | tolC        | 493  | 0 | Yes | Yes | Trimer              | Yes | No  | Calloni et al.                     |
| DNA primase                                                                                | NP_417538.1 | dnaG        | 581  | 0 | No  | No  | Monomer             | Yes | No  | Calloni et al.                     |
| predicted metal dependent hydrolase                                                        | NP_417556.2 | ygiP        | 167  | 0 | No  | No  | N/A                 | Yes | No  | Calloni et al.                     |
| uronate isomerase                                                                          | NP_417563.1 | uxaC        | 470  | 0 | No  | No  | N/A                 | No  | Yes | Fujiwara et al.                    |
| predicted lipid carrier protein, COG3154 family                                            | NP_417626.1 | yhbT        | 174  | 0 | No  | No  | N/A                 | Yes | No  | Calloni et al.                     |

|                                                                                                              |             |      |      |    |     |     |          |     |     |                                 |
|--------------------------------------------------------------------------------------------------------------|-------------|------|------|----|-----|-----|----------|-----|-----|---------------------------------|
| UDP-N-acetylglucosamine 1-carboxyvinyltransferase                                                            | NP_417656.1 | murA | 419  | 0  | Yes | No  | N/A      | Yes | No  | Calloni et al.                  |
| D-arabinose 5-phosphate isomerase                                                                            | NP_417664.1 | kdsD | 328  | 0  | No  | No  | Tetramer | Yes | No  | Calloni et al.                  |
| ABC transporter ATP-binding protein of the LptBFGC export complex                                            | NP_417668.1 | lptB | 241  | 0  | No  | No  | Tetramer | Yes | No  | Calloni et al.                  |
| glutamate synthase, large subunit                                                                            | NP_417679.2 | gltB | 1486 | 0  | No  | No  | >Hexamer | Yes | No  | Calloni et al.                  |
| N-acetylneuraminatase lyase                                                                                  | NP_417692.1 | nanA | 297  | 0  | Yes | No  | Tetramer | No  | Yes | Fujiwara et al.                 |
| CipXP protease specificity-enhancing factor                                                                  | NP_417695.1 | sspB | 165  | 0  | No  | No  | N/A      | Yes | No  | Calloni et al.                  |
| predicted peptidase                                                                                          | NP_417711.1 | tldD | 481  | 0  | No  | No  | N/A      | No  | Yes | Fujiwara et al.                 |
| cell wall structural complex MreBCD, actin-like component MreB                                               | NP_417717.2 | mreB | 347  | 0  | No  | No  | N/A      | Yes | No  | Calloni et al.                  |
| tRNA-dihydrouridine synthase B                                                                               | NP_417726.1 | dusB | 321  | 0  | No  | No  | N/A      | Yes | Yes | Fujiwara et al., Calloni et al. |
| predicted DNA                                                                                                | YP_026210.1 | yrdD | 180  | 0  | No  | No  | N/A      | Yes | No  | Calloni et al.                  |
| fused predicted transporter subunits of ABC superfamily: ATP-binding components                              | NP_417811.1 | yheS | 637  | 0  | No  | No  | N/A      | Yes | No  | Calloni et al.                  |
| DNA-binding transcriptional dual regulator                                                                   | NP_417816.1 | crp  | 210  | 0  | Yes | No  | Dimer    | Yes | No  | Calloni et al.                  |
| nitrite reductase, large subunit, NAD(P)H-binding                                                            | NP_417824.1 | nirB | 847  | 0  | No  | No  | Dimer    | Yes | No  | Calloni et al.                  |
| GMP/IMP nucleotidase                                                                                         | NP_417858.4 | yrfG | 222  | 0  | No  | No  | N/A      | Yes | No  | Calloni et al.                  |
| ferrous iron transporter, protein A                                                                          | NP_417867.1 | feoA | 75   | 0  | No  | No  | N/A      | Yes | No  | Calloni et al.                  |
| fused ferrous iron transporter, protein B: GTP-binding protein/membrane protein                              | NP_417868.1 | feoB | 773  | 10 | No  | No  | N/A      | Yes | No  | Calloni et al.                  |
| conserved protein                                                                                            | NP_417879.1 | rtcB | 408  | 0  | No  | No  | Monomer  | Yes | No  | Calloni et al.                  |
| aspartate-semialdehyde dehydrogenase, NAD(P)-binding                                                         | NP_417891.1 | asd  | 367  | 0  | Yes | No  | Dimer    | No  | Yes | Fujiwara et al.                 |
| glycerol-3-phosphate transporter subunit                                                                     | NP_417907.2 | ugpC | 356  | 0  | No  | No  | Pentamer | Yes | No  | Calloni et al.                  |
| leucine/isoleucine/valine transporter subunit                                                                | YP_026223.1 | livJ | 367  | 0  | Yes | Yes | N/A      | Yes | No  | Calloni et al.                  |
| predicted transporter subunit: ATP-binding component of ABC superfamily                                      | NP_417920.1 | ftsE | 222  | 0  | No  | No  | N/A      | Yes | Yes | Fujiwara et al., Calloni et al. |
| holo-(acyl carrier protein) synthase 2                                                                       | NP_417932.1 | acpT | 195  | 0  | No  | No  | N/A      | Yes | No  | Calloni et al.                  |
| acid-resistance protein                                                                                      | NP_417966.4 | hdeB | 108  | 0  | No  | Yes | N/A      | Yes | No  | Calloni et al.                  |
| transcriptional activator of gadA and gadBC in absence of GadX                                               | NP_417972.1 | gadW | 242  | 0  | No  | No  | Dimer    | Yes | No  | Calloni et al.                  |
| cellulose production protein                                                                                 | NP_417993.1 | bcsE | 523  | 0  | No  | No  | N/A      | Yes | No  | Calloni et al.                  |
| 3-methyl-adenine DNA glycosylase I, constitutive                                                             | NP_418005.1 | tag  | 187  | 0  | Yes | No  | N/A      | Yes | No  | Calloni et al.                  |
| predicted transcriptional regulator, HTH_CROC1 family                                                        | NP_418011.1 | yiaG | 96   | 0  | No  | No  | N/A      | Yes | No  | Calloni et al.                  |
| D-xylose isomerase                                                                                           | NP_418022.1 | xylA | 440  | 0  | No  | No  | Tetramer | No  | Yes | Fujiwara et al.                 |
| aldehyde dehydrogenase B                                                                                     | NP_418045.4 | aldB | 512  | 0  | No  | No  | Tetramer | No  | Yes | Fujiwara et al.                 |
| L-lactate dehydrogenase, FMN-linked                                                                          | NP_418062.1 | lldD | 396  | 0  | No  | No  | N/A      | No  | Yes | Fujiwara et al.                 |
| predicted polysaccharide deacetylase                                                                         | NP_418071.4 | yibQ | 319  | 1  | No  | Yes | N/A      | Yes | No  | Calloni et al.                  |
| lipopolysaccharide core biosynthesis protein                                                                 | NP_418082.1 | rfaY | 232  | 0  | No  | No  | N/A      | Yes | No  | Calloni et al.                  |
| heat shock chaperone                                                                                         | NP_418141.2 | ibpB | 142  | 0  | No  | No  | Dimer    | Yes | No  | Calloni et al.                  |
| heat shock chaperone                                                                                         | NP_418142.1 | ibpA | 137  | 0  | No  | No  | N/A      | Yes | No  | Calloni et al.                  |
| phosphate transporter subunit                                                                                | NP_418181.1 | pstB | 257  | 0  | No  | No  | Pentamer | Yes | No  | Calloni et al.                  |
| asparagine synthetase A                                                                                      | NP_418200.1 | asnA | 330  | 0  | Yes | No  | Dimer    | Yes | No  | Calloni et al.                  |
| predicted von Willibrand factor containing protein                                                           | YP_026243.1 | viaA | 483  | 0  | No  | No  | N/A      | Yes | No  | Calloni et al.                  |
| D-ribose transporter subunit                                                                                 | NP_418207.1 | rbsB | 296  | 0  | Yes | Yes | N/A      | Yes | No  | Calloni et al.                  |
| conserved protein, 4HBT family of thioesterases                                                              | NP_418264.4 | yigl | 155  | 0  | No  | No  | N/A      | Yes | No  | Calloni et al.                  |
| bifunctional 2-octaprenyl-6-methoxy-1,4-benzoquinone methylase/ S-adenosylmethionine:2-DMK methyltransferase | YP_026269.1 | ubiE | 251  | 0  | No  | No  | N/A      | Yes | No  | Calloni et al.                  |
| quality control of Tat-exported FeS proteins; Mg-dependent cytoplasmic DNase                                 | YP_026271.1 | tatD | 260  | 0  | Yes | No  | Monomer  | No  | Yes | Fujiwara et al.                 |
| 3-ketoacyl-CoA thiolase (thiolase I)                                                                         | YP_026272.1 | fadA | 387  | 0  | Yes | No  | Tetramer | No  | Yes | Fujiwara et al.                 |
| proline dipeptidase                                                                                          | NP_418289.1 | pepQ | 443  | 0  | No  | No  | N/A      | No  | Yes | Fujiwara et al.                 |

|                                                                                                |             |             |      |   |     |     |                     |     |     |                                 |
|------------------------------------------------------------------------------------------------|-------------|-------------|------|---|-----|-----|---------------------|-----|-----|---------------------------------|
| protoporphyrin oxidase, flavoprotein                                                           | NP_418292.1 | hemG        | 181  | 0 | No  | No  | unspecific oligomer | Yes | No  | Calloni et al.                  |
| sensory histidine kinase in two-component regulatory system with GlnG                          | NP_418305.1 | glnL        | 349  | 0 | No  | No  | N/A                 | Yes | No  | Calloni et al.                  |
| formate dehydrogenase formation protein                                                        | NP_418327.1 | fdhE        | 309  | 0 | No  | No  | N/A                 | Yes | No  | Calloni et al.                  |
| conserved protein                                                                              | NP_418355.1 | yjiQ        | 199  | 0 | No  | Yes | N/A                 | Yes | No  | Calloni et al.                  |
| methylenetetrahydrofolate reductase                                                            | NP_418376.1 | metF        | 296  | 0 | Yes | No  | Tetramer            | No  | Yes | Fujiwara et al.                 |
| acetylornithine deacetylase subunit                                                            | NP_418392.1 | argE        | 383  | 0 | No  | No  | Dimer               | Yes | Yes | Fujiwara et al., Calloni et al. |
| tyrosine lyase, involved in thiamin-thiazole moiety synthesis                                  | NP_418414.1 | rpoB        | 1342 | 0 | Yes | No  | N/A                 | Yes | No  | Calloni et al.                  |
| adenylyltransferase, modifies ThiS C-terminus                                                  | NP_418417.1 | thiH        | 377  | 0 | No  | No  | Dimer               | Yes | Yes | Fujiwara et al., Calloni et al. |
| thiamin phosphate synthase (thiamin phosphate pyrophosphorylase)                               | NP_418420.4 | thiF        | 251  | 1 | Yes | No  | Dimer               | Yes | No  | Calloni et al.                  |
| thiamin phosphate synthase (thiamin phosphate pyrophosphorylase)                               | NP_418421.1 | thiE        | 211  | 0 | No  | No  | N/A                 | Yes | No  | Calloni et al.                  |
| stationary phase protein, binds sigma 70 RNA polymerase subunit                                | NP_418423.1 | rsd         | 158  | 0 | Yes | No  | N/A                 | Yes | No  | Calloni et al.                  |
| homocysteine-N5-methyltetrahydrofolate transmethylase, B12-dependent                           | NP_418443.1 | methH       | 1227 | 0 | No  | No  | N/A                 | Yes | No  | Calloni et al.                  |
| chorismate-pyruvate lyase                                                                      | NP_418463.4 | ubiC        | 165  | 0 | Yes | No  | Monomer             | Yes | No  | Calloni et al.                  |
| DNA-binding transcriptional repressor, Zn(II)-binding                                          | NP_418470.4 | zur         | 171  | 0 | No  | No  | N/A                 | Yes | No  | Calloni et al.                  |
| ATPase and DNA damage recognition protein of nucleotide excision repair excinuclease UvrABC    | NP_418482.1 | uvrA        | 940  | 0 | No  | No  | Tetramer            | Yes | No  | Calloni et al.                  |
| ribose 5-phosphate isomerase B/allose 6-phosphate isomerase                                    | NP_418514.1 | rpiB        | 149  | 0 | Yes | No  | N/A                 | Yes | No  | Calloni et al.                  |
| predicted acyltransferase with acyl-CoA N-acyltransferase domain                               | NP_418517.1 | phnO        | 144  | 0 | No  | No  | N/A                 | Yes | No  | Calloni et al.                  |
| EF-P lysylation protein; weak lysine 2,3-aminomutase                                           | NP_418570.1 | yjeK        | 342  | 0 | No  | No  | N/A                 | Yes | No  | Calloni et al.                  |
| outer membrane lipoprotein (lipocalin), cell division and growth function                      | NP_418573.1 | bic         | 177  | 0 | Yes | Yes | Dimer               | Yes | No  | Calloni et al.                  |
| fumarate reductase (anaerobic), Fe-S subunit                                                   | NP_418577.1 | frdB        | 244  | 0 | Yes | No  | Tetramer            | Yes | No  | Calloni et al.                  |
| fumarate reductase (anaerobic) catalytic and NAD/flavoprotein subunit                          | NP_418578.1 | frdA        | 602  | 0 | Yes | No  | Tetramer            | No  | Yes | Fujiwara et al.                 |
| methyl-directed mismatch repair protein                                                        | NP_418591.1 | mutL        | 615  | 0 | No  | No  | N/A                 | Yes | No  | Calloni et al.                  |
| predicted cell envelope opacity-associated protein                                             | NP_418627.4 | ytfB        | 212  | 0 | No  | No  | N/A                 | Yes | No  | Calloni et al.                  |
| predicted peptidase required for the maturation and secretion of the antibiotic peptide MccB17 | NP_418656.1 | tldE (pmbA) | 450  | 0 | Yes | No  | N/A                 | No  | Yes | Fujiwara et al.                 |
| predicted alcohol dehydrogenase, Zn-dependent and NAD(P)-binding                               | NP_418690.4 | yigB        | 339  | 0 | No  | No  | N/A                 | Yes | No  | Calloni et al.                  |
| KpLE2 phage-like element; predicted lyase/synthase                                             | NP_418718.4 | yjhH        | 301  | 0 | No  | No  | Tetramer            | No  | Yes | Fujiwara et al.                 |
| periplasmic protein                                                                            | NP_418793.1 | osmY        | 201  | 0 | No  | Yes | N/A                 | Yes | No  | Calloni et al.                  |
| predicted phospholipase, patatin-like family                                                   | NP_418794.1 | yjiU        | 357  | 0 | No  | No  | N/A                 | No  | Yes | Fujiwara et al.                 |
| thymidine phosphorylase                                                                        | NP_418799.1 | deoA        | 440  | 0 | Yes | No  | Dimer               | No  | Yes | Fujiwara et al.                 |
| DNA repair protein                                                                             | NP_418806.1 | radA        | 460  | 0 | No  | No  | N/A                 | Yes | No  | Calloni et al.                  |

| Summary | <200 aa: 38  | at least 1  | PDB: 74     | sig. seq.: 23     | Monomers: 11            | DnaK substrates: 181 | GroEL substrates: 57 |
|---------|--------------|-------------|-------------|-------------------|-------------------------|----------------------|----------------------|
|         | >200 aa: 189 | TM helix: 5 | no PDB: 153 | no sig. seq.: 204 | Dimers: 36              |                      |                      |
|         |              |             |             |                   | Trimers: 5              |                      |                      |
|         |              |             |             |                   | Tetramers: 23           |                      |                      |
|         |              |             |             |                   | Pentamers: 6            |                      |                      |
|         |              |             |             |                   | Hexamers: 9             |                      |                      |
|         |              |             |             |                   | >Hexamers: 11           |                      |                      |
|         |              |             |             |                   | unspecific oligomers: 2 |                      |                      |
